# Supplementary material for: Kidney Function, ACE-Inhibitor/Angiotensin Receptor Blocker Use, and Survival Following Hospitalization for Heart Failure: A Cohort Study
Source: PubMed Central journal article supplement — Can J Kidney Health Dis. 2018 Oct 15;5:2054358118804838. doi: 10.1177/2054358118804838 (PMC6194922; doi:10.1177/2054358118804838), 2018-10-15
Supplement: Supplementary_Figure_1,2_and_3_(1).pdf [file Supplementary_Figure_1%2C2_and_3_%281%29.pdf]

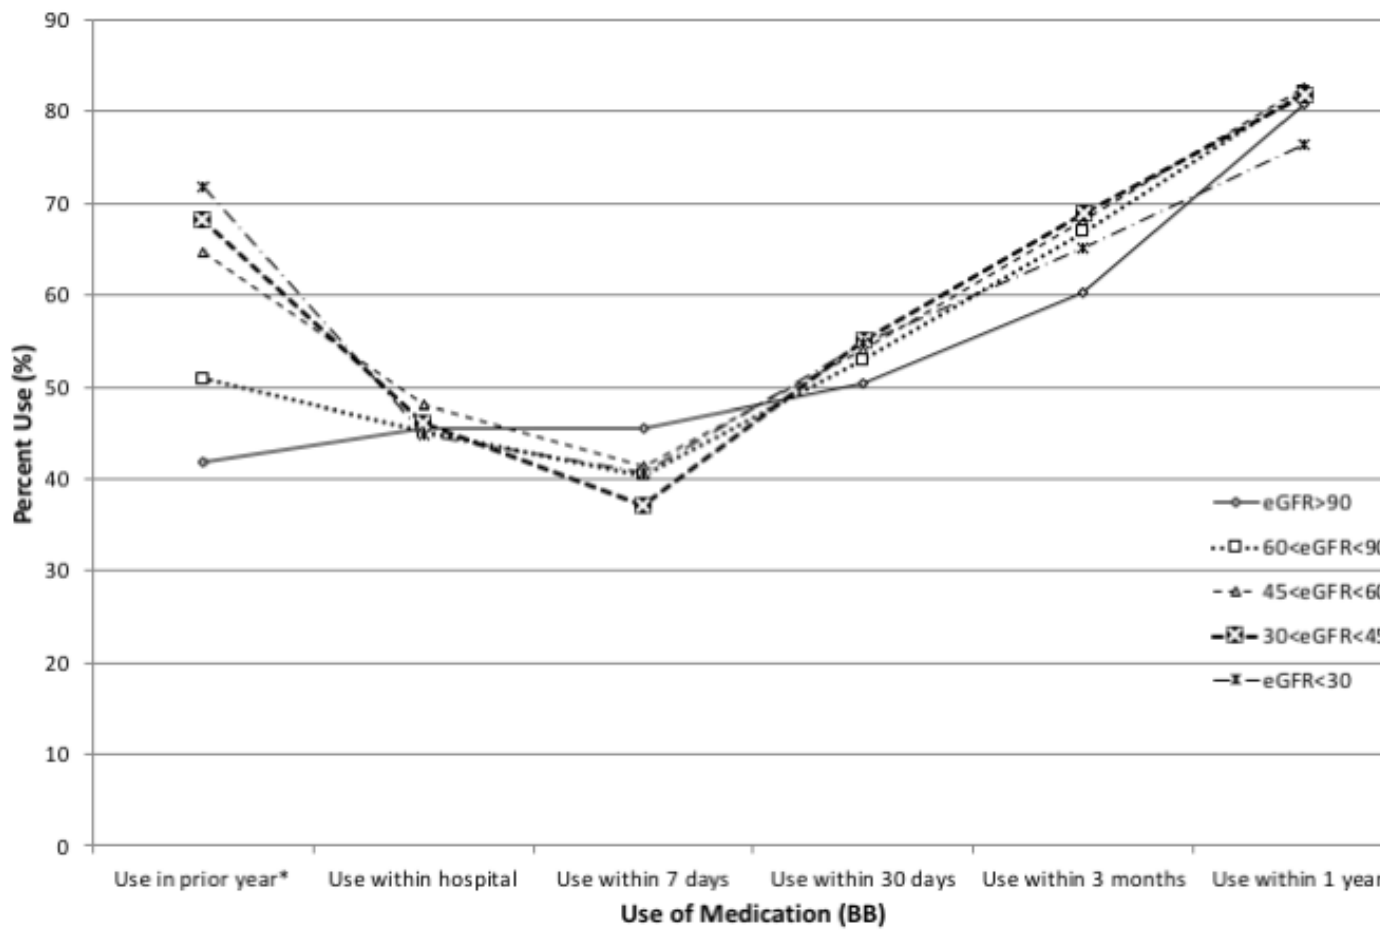

Supplementary Figure 1 - Percentage of patients in the Southern Alberta cohort hospitalized with heart failure receiving beta-blocker at varying times before and after hospital admission, according to discharge eGFR

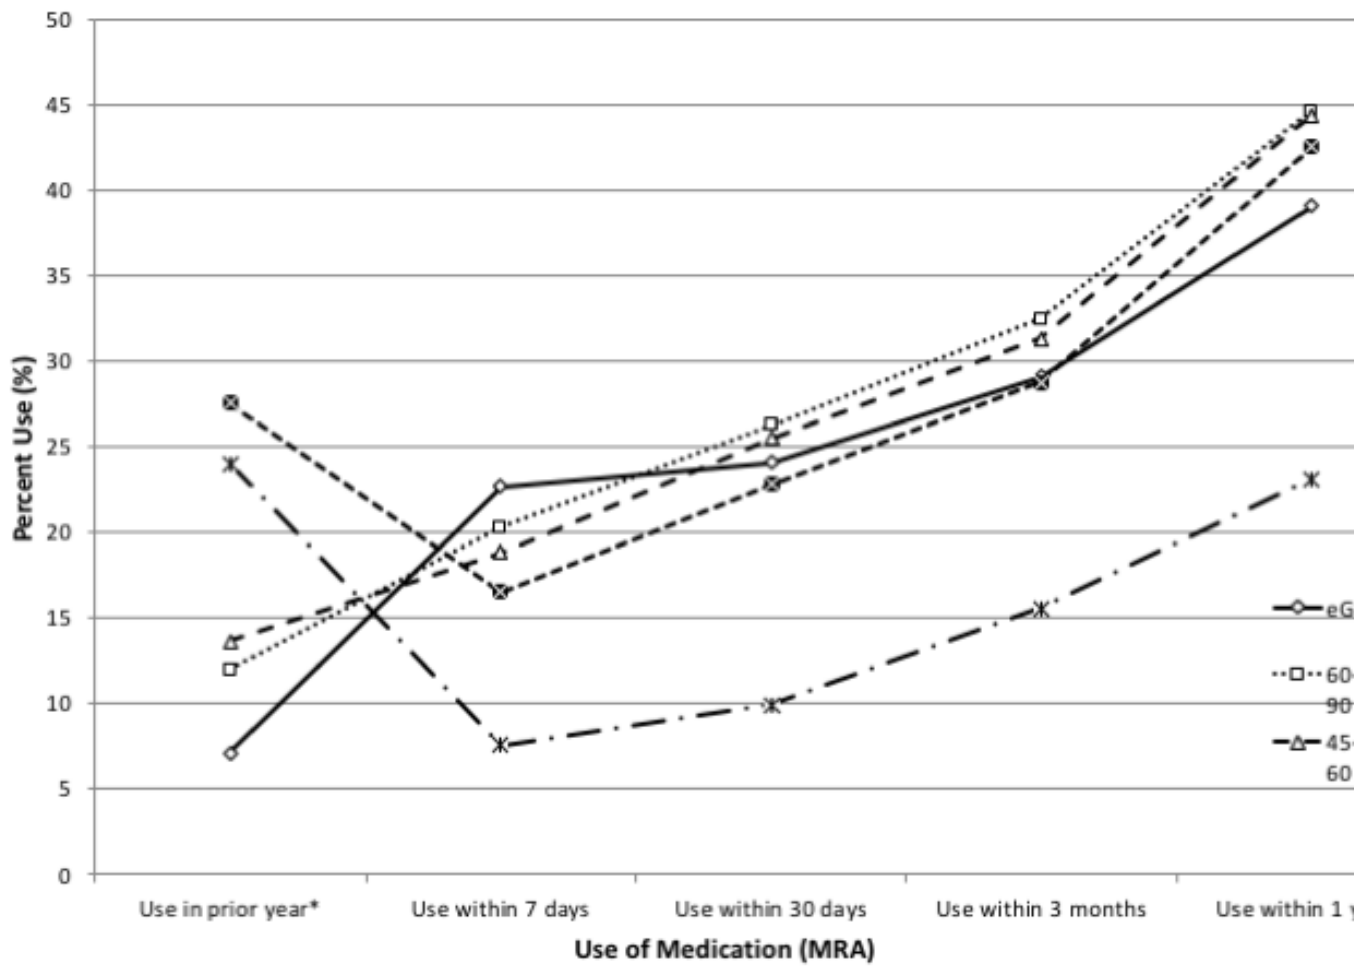

Supplementary Figure 2 - Percentage of patients in the Southern Alberta cohort hospitalized with heart failure receiving spironolactone at varying times before and after hospital admission, according to discharge eGFR

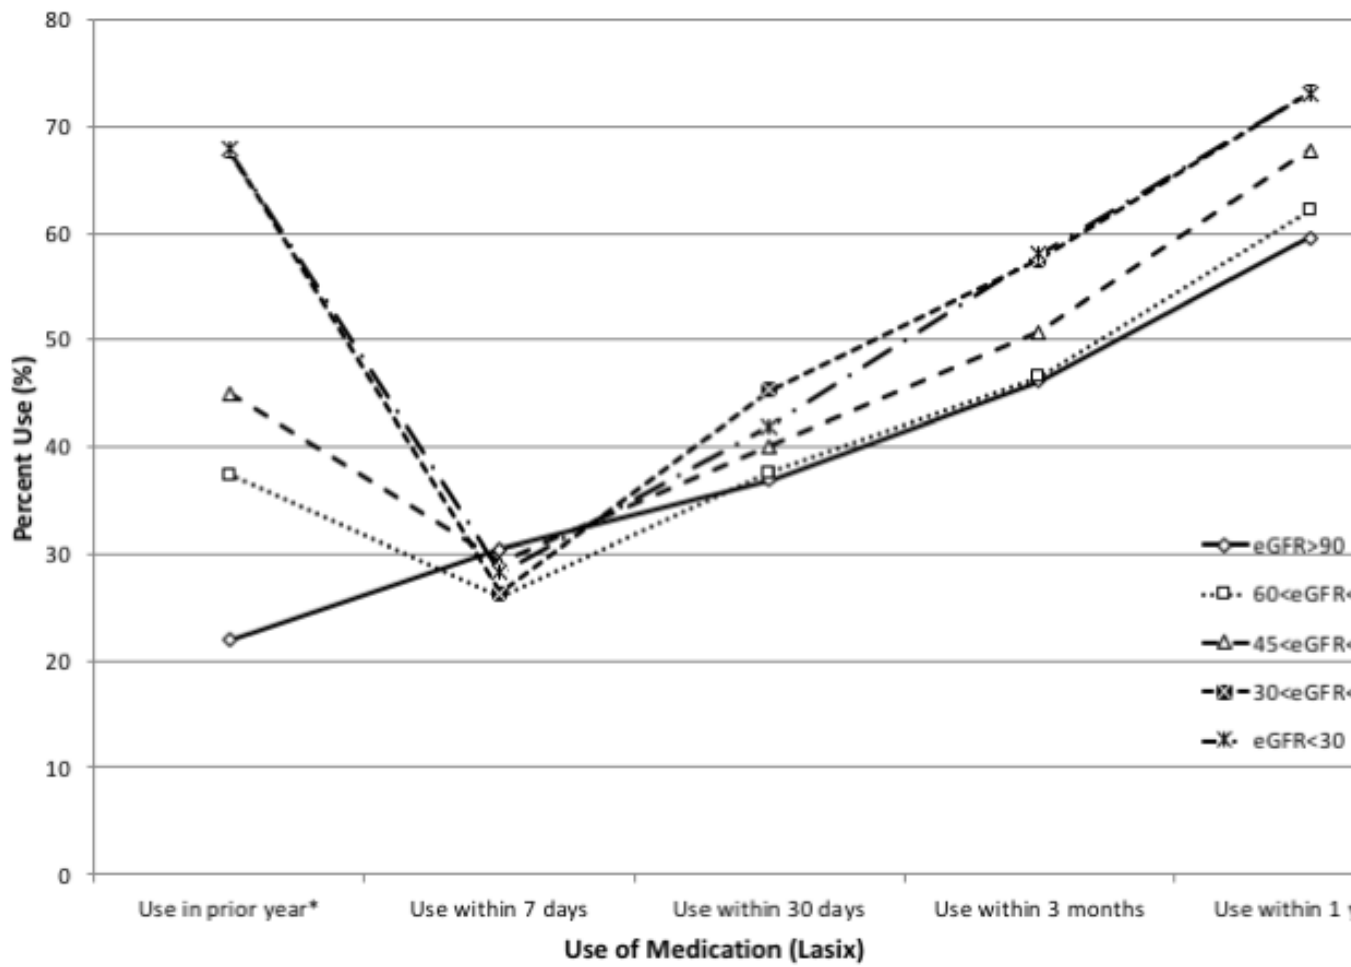

Supplementary Figure 3 - Percentage of patients in the Southern Alberta cohort hospitalized with heart failure receiving furosemide at varying times before and after hospital admission, according to discharge eGFR
